# Supplementary material
Source: PubMed Central journal article supplement (PMC2040430)

a)

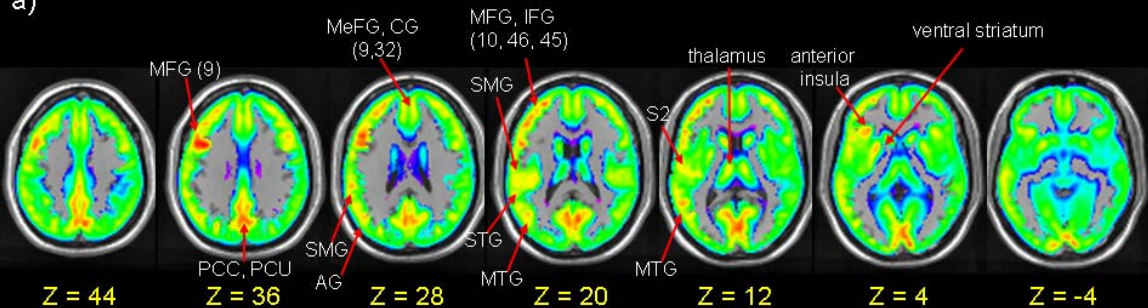

b)

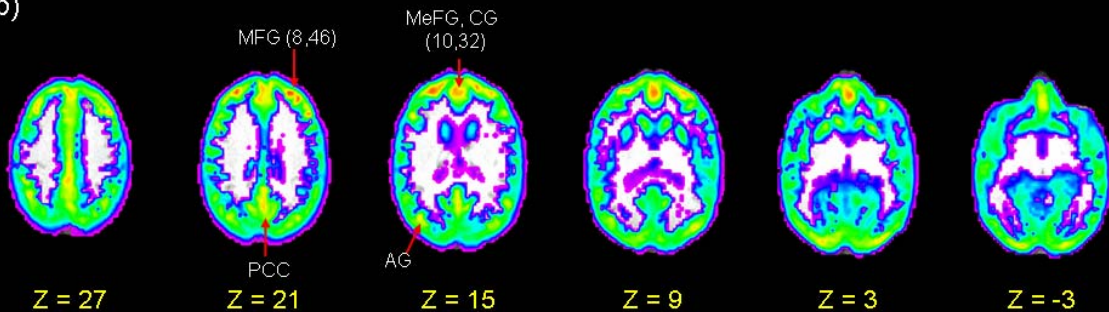

Supplement: pnas_0705132104_1.pdf [file pnas_0705132104_1.pdf]

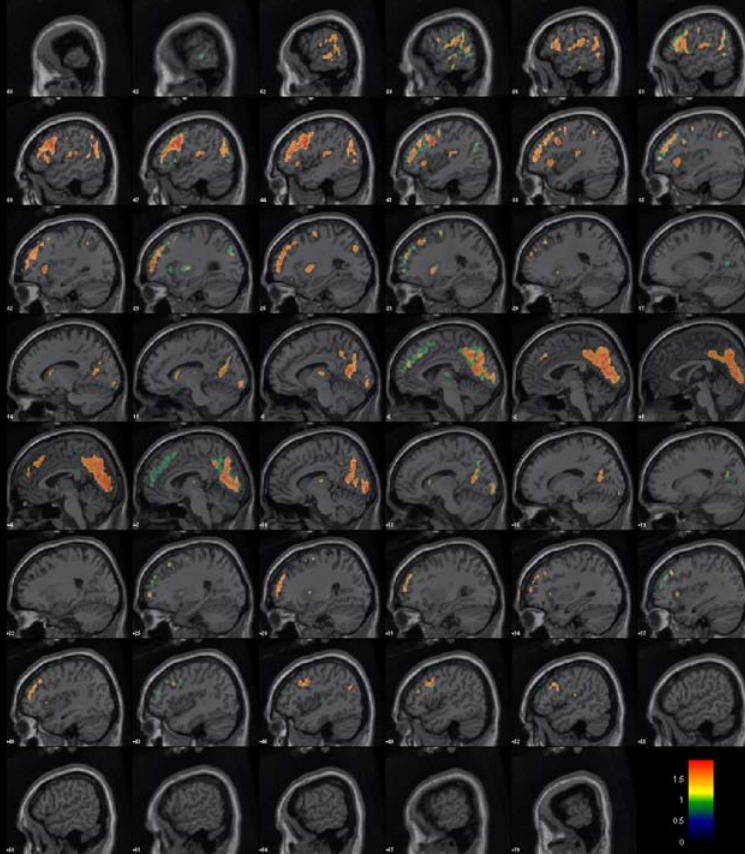

Supplement: pnas_0705132104_2.pdf [file pnas_0705132104_2.pdf]

-36

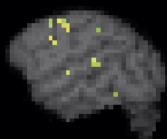

-30

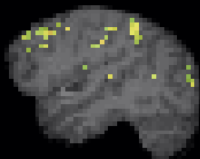

-24

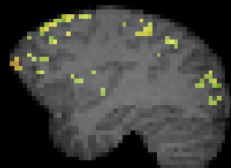

-18

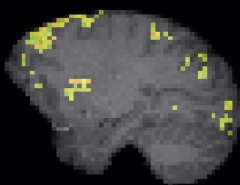

-12

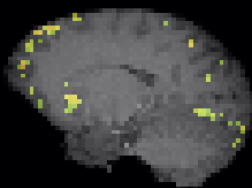

-6

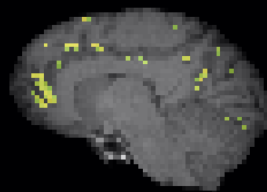

+0

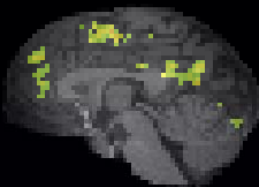

+6

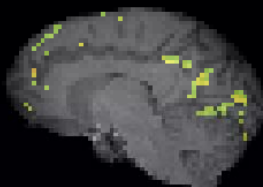

+12

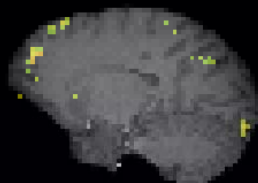

+18

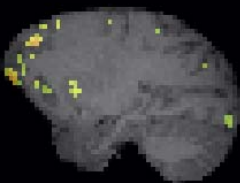

+24

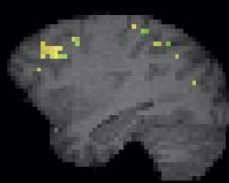

+30

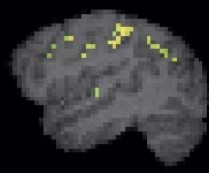

+36

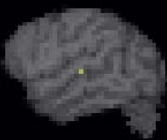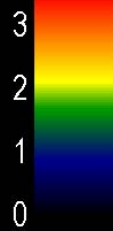

Supplement: pnas_0705132104_3.pdf [file pnas_0705132104_3.pdf]

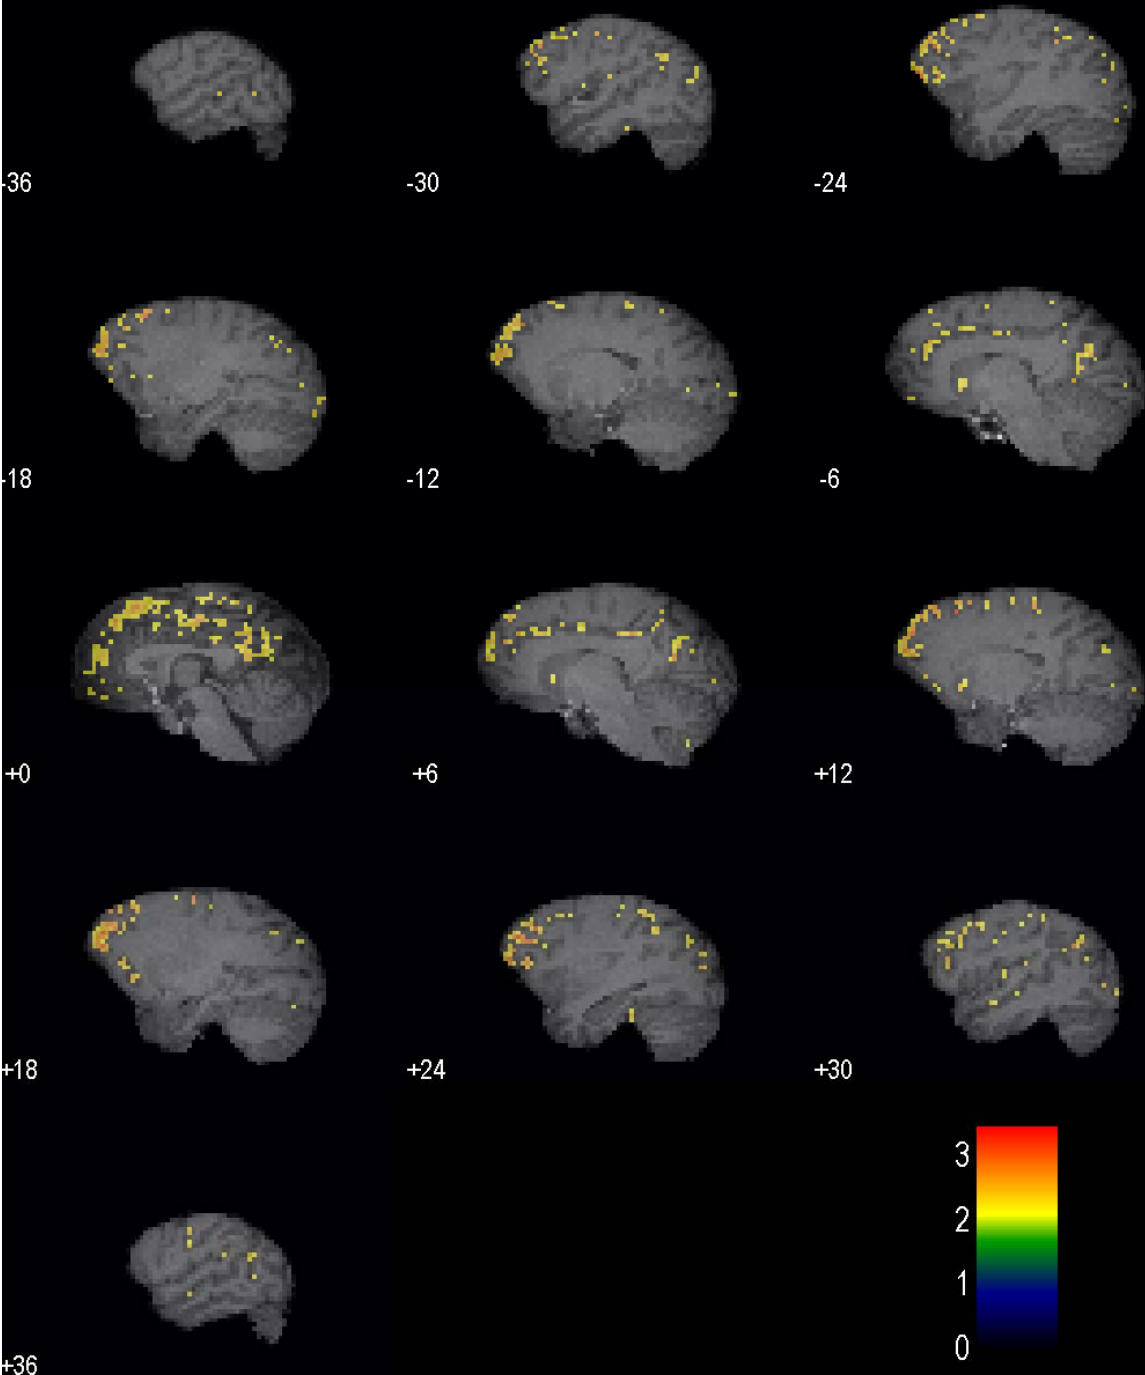

Supplement: pnas_0705132104_4.pdf [file pnas_0705132104_4.pdf]

-36

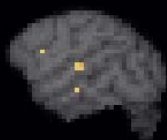

-30

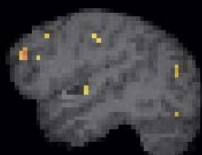

-24

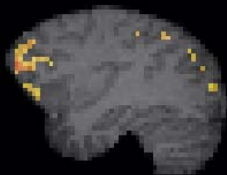

-18

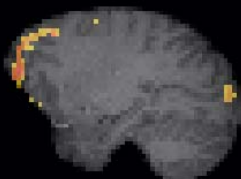

-12

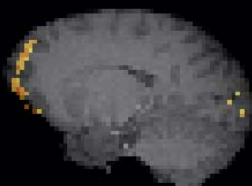

-6

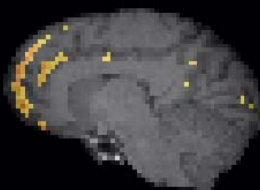

+0

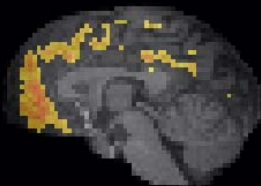

+6

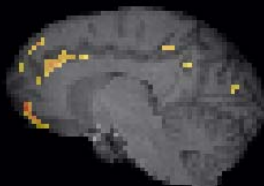

+12

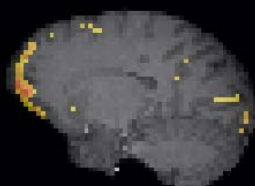

+18

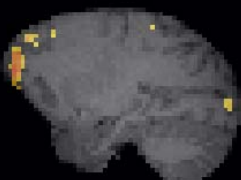

+24

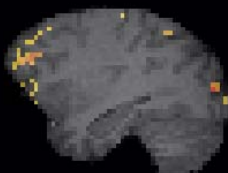

+30

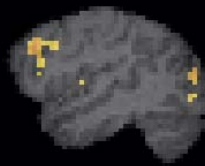

+36

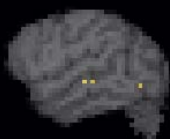

3

2

1

0

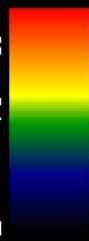

Supplement: pnas_0705132104_5.pdf [file pnas_0705132104_5.pdf]

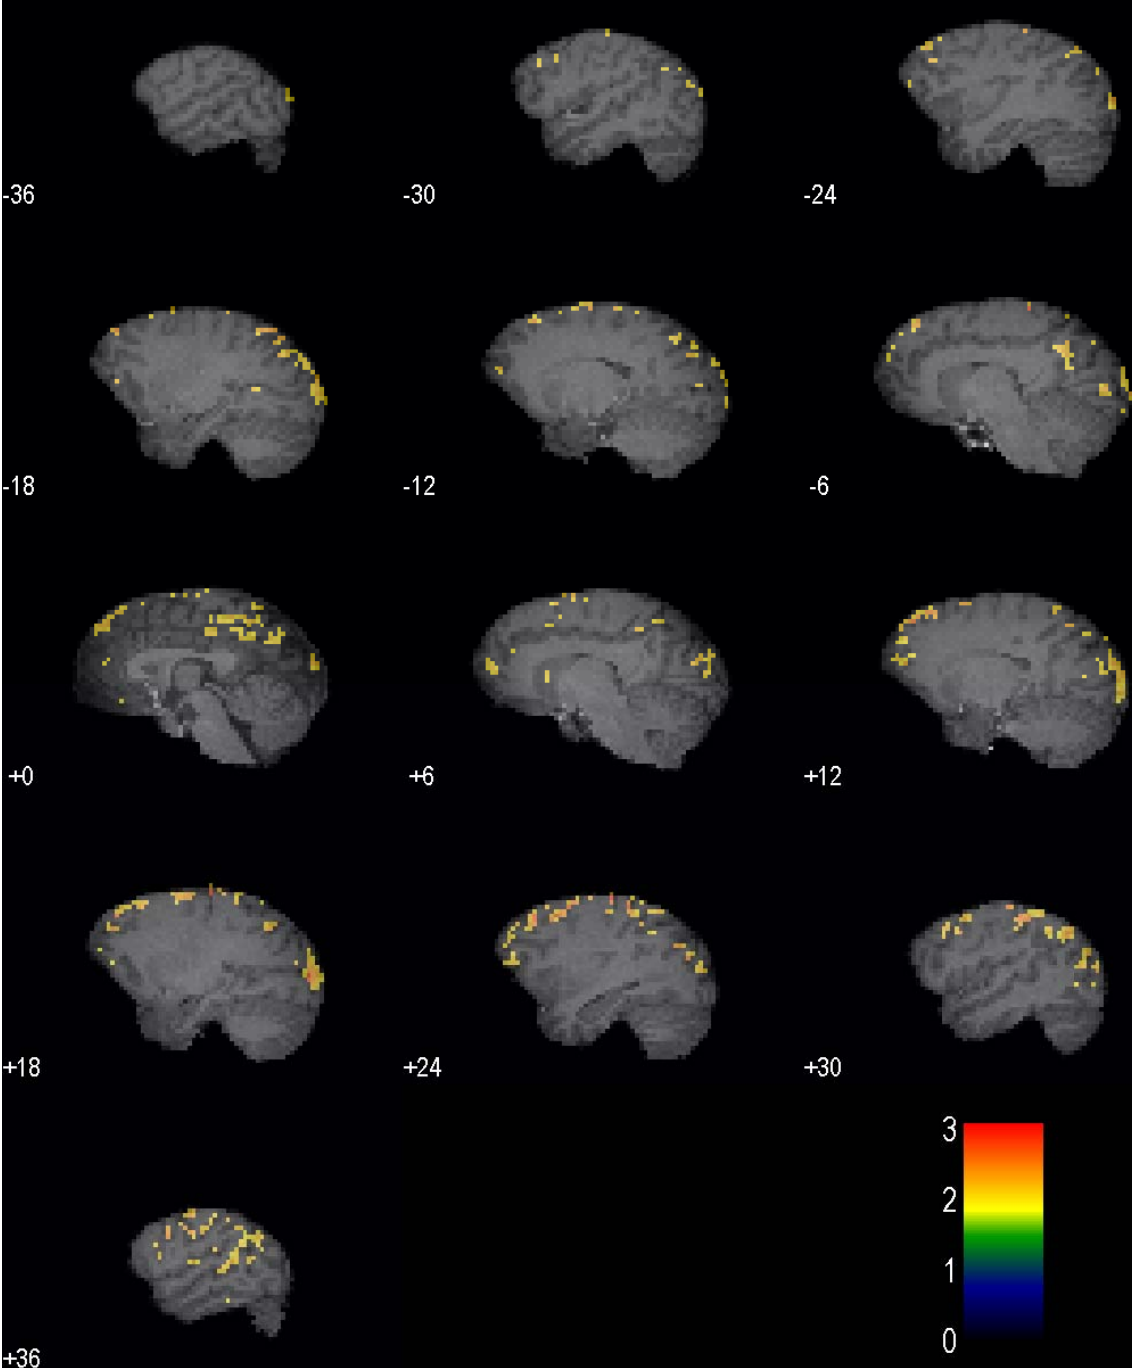

Supplement: pnas_0705132104_6.pdf [file pnas_0705132104_6.pdf]

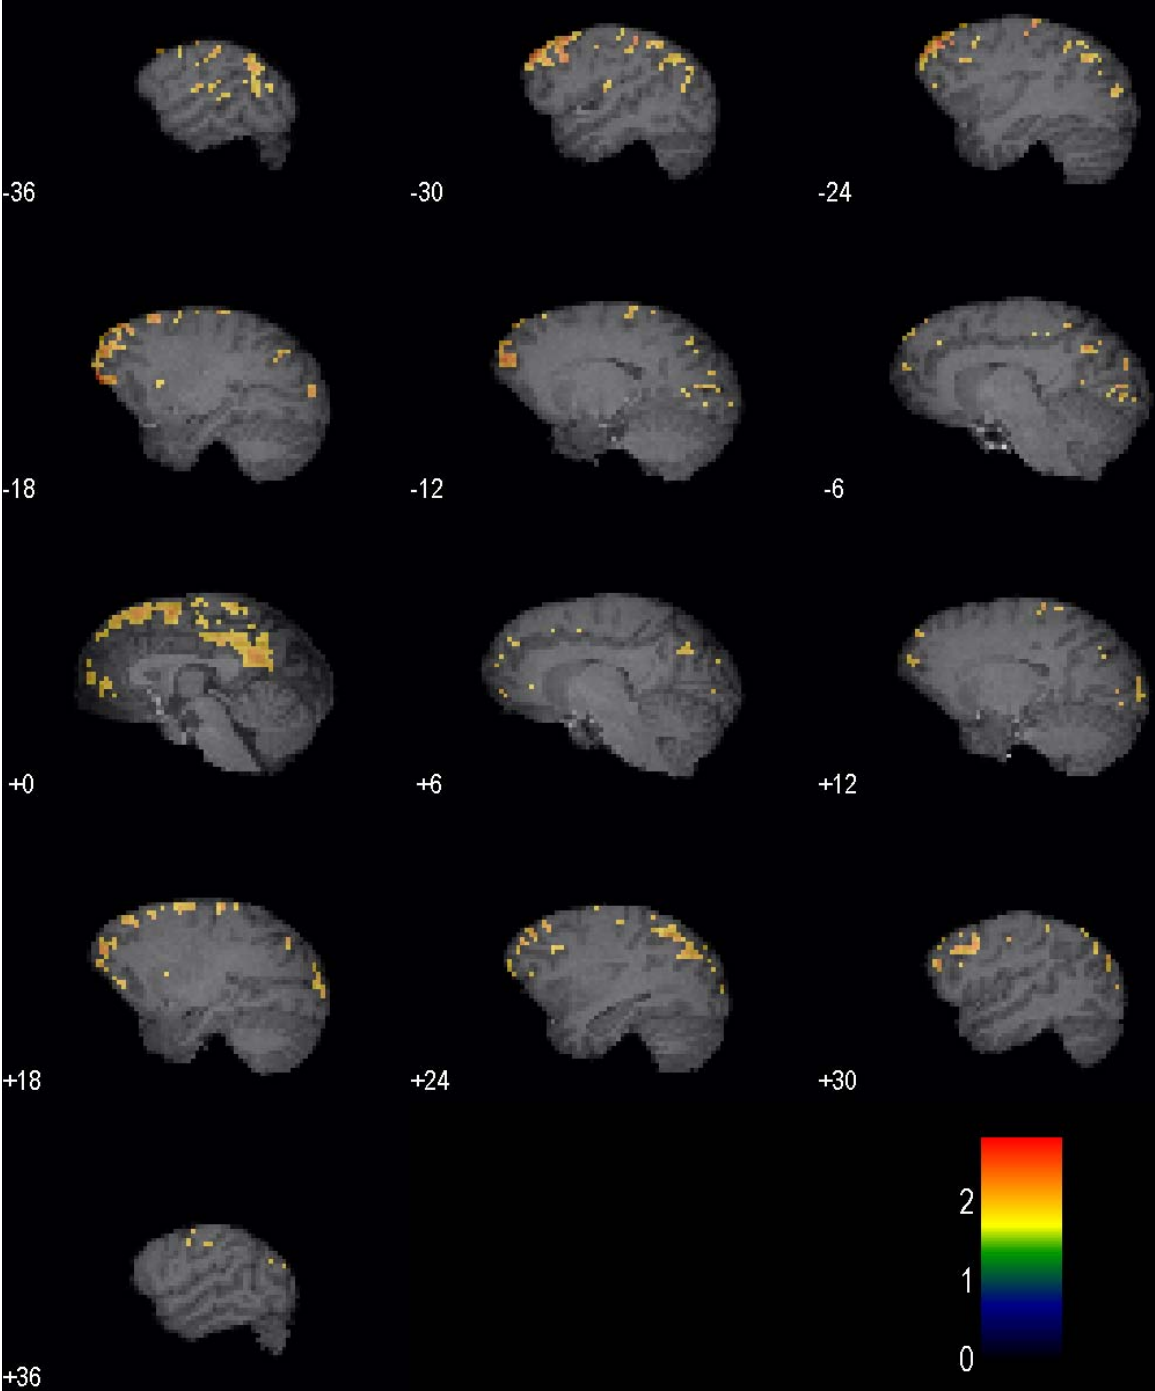

Supplement: pnas_0705132104_7.pdf [file pnas_0705132104_7.pdf]
